# Supplementary material for: PAXX and its paralogs synergistically direct DNA polymerase λ activity in DNA repair
Source: PubMed Central journal article supplement (PMC6155126; doi:10.1038/s41467-018-06127-y), 2018-09-24
Supplement: 41467_2018_6127_MOESM1_ESM.pdf [file 41467_2018_6127_MOESM1_ESM.pdf]

**SUPPLEMENTARY INFORMATION FILE to:**

**PAXX and its paralogues synergistically direct DNA polymerase  $\lambda$  activity in DNA repair.**

Andrew Craxton<sup>1</sup>, Deeksha Munnur<sup>1,2</sup>, Rebekah Jukes-Jones<sup>1</sup>, George Skalka<sup>1</sup>, Claudia Langlais<sup>1</sup>,  
Kelvin Cain<sup>1</sup> and Michal Malewicz<sup>1,\*</sup>

<sup>1</sup>MRC Toxicology Unit, Hodgkin Building, Lancaster Road, Leicester, LE1 9HN, UK.

<sup>2</sup>Current address: Sir William Dunn School of Pathology, South Parks Road, University of Oxford,  
Oxford, UK

Running title: PAXX and its paralogs regulate DNA Polymerase  $\lambda$  function in NHEJ

\*To whom correspondence should be addressed:

Michal Malewicz, MRC Toxicology Unit, Hodgkin Building, Lancaster Road, LE1 9HN Leicester, UK;  
tel: 00441162525579; fax: 00441162525616; e-mail: mzm23@mrc-tox.cam.ac.uk



**Supplementary Figure 1: Comparative Analysis of the Proteomes of XRCC4 Family Proteins.**

(a): Schematic figure showing a flow chart for the identification of FLAG-tagged PAXX, -XLF and –XRCC4 associated proteins by affinity chromatography and mass spectrometry from benzonase-treated “soluble chromatin” and nucleoplasmic fractions from HEK293 cells. (b): Untreated (-), irradiated (IR, 10Gy) or Zeocin (Z)-treated HEK293F cells were fractionated into non-nuclear soluble (CYT) or nuclear soluble (NP) or nuclear pellets. Nuclear pellets were either incubated with benzonase (Bz) or a combination of benzonase and micrococcal nuclease (Bz/MNuc). Fractions were resolved by SDS-PAGE and immunoblotted with the indicated antibodies. (c-d): Eluates of purified anti-FLAG IPs from (c) soluble chromatin or (d) nucleoplasmic fractions isolated from HEK293F-control, -FLAG-PAXX, -XLF, -XRCC4 or DNA-PKcs-expressing cells were resolved by SDS-PAGE and analysed by silver-staining. (e-f): As above, except the indicated NHEJ proteins were detected by immunoblotting using (e) soluble chromatin or (f) nucleoplasmic fractions.

## Supplementary Figure 2

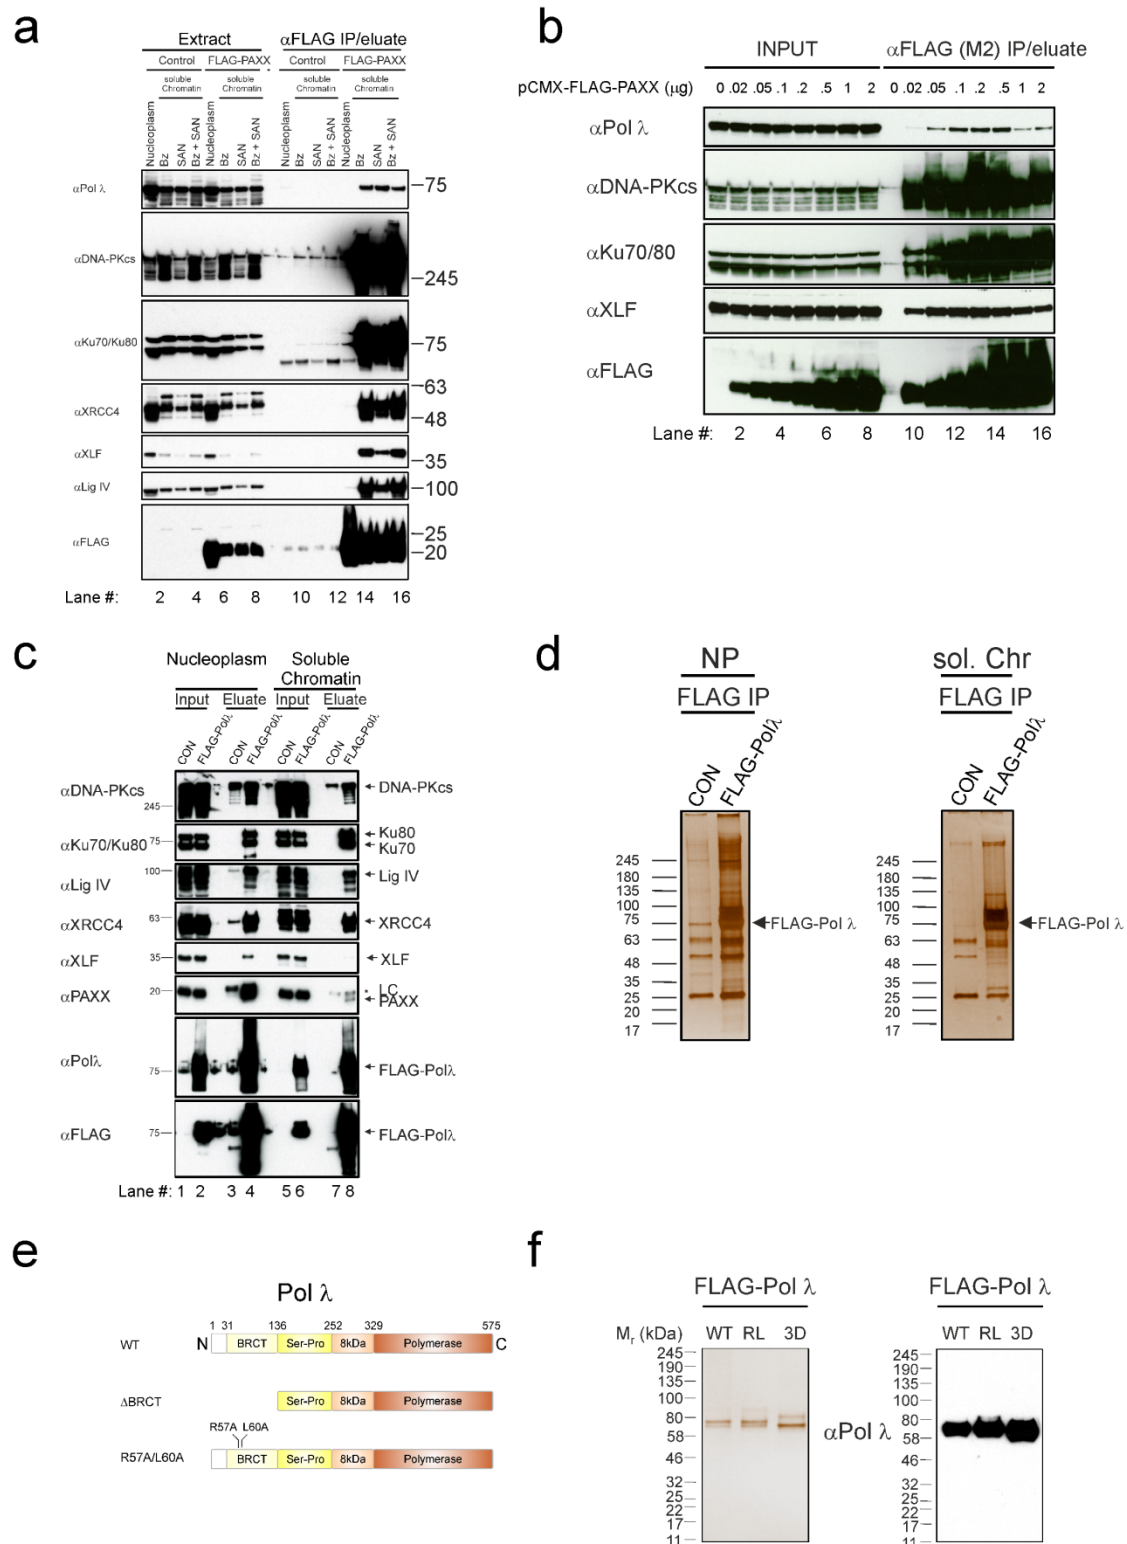

**Supplementary Figure 2: Pol λ interacts with endogenous PAXX and its paralogs in cells.**

(a): HEK293F or (b): U2OS cells were transiently transfected with either pCMX-LacZ (Control) or pCMX-FLAG-PAXX and nucleoplasmic or soluble extracts from benzonase- and/or salt active



nuclease (SAN)-treated nuclear pellets were isolated. Following anti-FLAG IP and FLAG peptide elution, FLAG-PAXX and associated proteins were eluted, resolved by SDS-PAGE and immunoblotted for the indicated proteins. (c): As described in Panel A, except that HEK293F cells were transiently transfected with either pCMX-LacZ (Control) or pCMX-FLAG-Pol  $\lambda$ . (d): Extracts from either nucleoplasmic (NP) or soluble chromatin (sol. Chr.) fractions or eluates of purified anti-FLAG IPs from HEK293F cells transiently transfected with either empty vector or FLAG-Pol  $\lambda$  were resolved by SDS-PAGE and visualized by silver staining. The position of FLAG-Pol  $\lambda$  was confirmed by immunoblotting and is indicated by a black arrow. (e): Schematic representation of Pol  $\lambda$  BRCT domain deletion mutant and  $\alpha$ -helix 1 R57A/L60A mutant. (f): Silver-stained gel and anti-FLAG immunoblot for purified human Pol  $\lambda$ -WT, -R57A/L60A and -D427A/D429A/D490A.

### Supplementary Figure 3

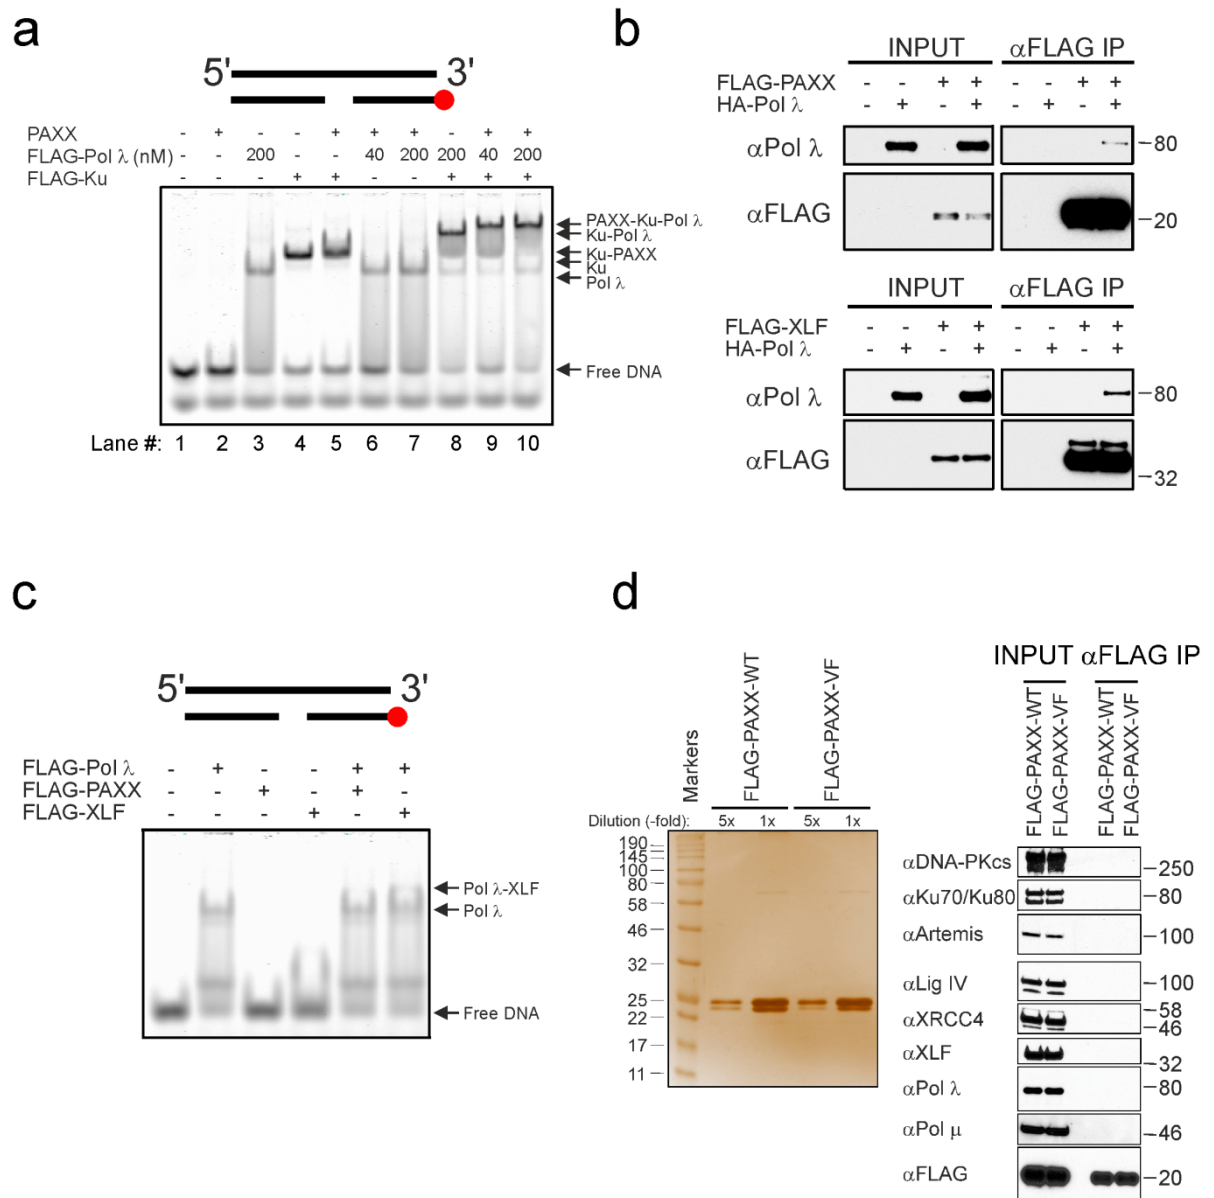

### Supplementary Figure 3: Interaction of PAXX with Pol λ requires the Ku binding motif of

**PAXX.** (a): EMSA showing that interaction of PAXX with Pol λ requires DNA-bound Ku. Reactions were performed with 20 nM IRDye® 700-labelled 5nt-gapped dsDNA (30-mer) and the following concentrations of FLAG-Ku70/80 (20 nM), FLAG-Pol λ (40 or 200 nM) or cleaved PAXX (0.5 μM). (b): *In vitro* interaction of PAXX or XLF with Pol λ. Affinity purified FLAG-PAXX (*upper panel*) or FLAG-XLF (*lower panel*) were mixed with affinity purified HA- Pol λ and immunoprecipitated with FLAG (M2)-agarose. Following FLAG peptide elution, eluates were immunoblotted with the

indicated antibodies. (c): As shown above in Panel A, except that reactions contained the indicated proteins (d): Silver-stained gel (*left* panel) and immunoblots (*right* panel) of purified FLAG-tagged human PAXX-WT or a V199A/F201A (VF) mutant. Immunoblots were probed with the indicated antibodies.

Supplementary Figure 4

a

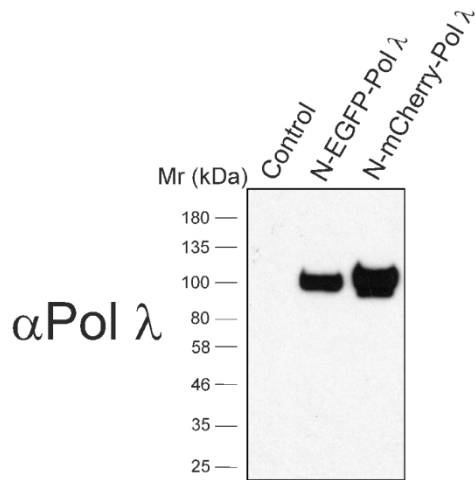

b

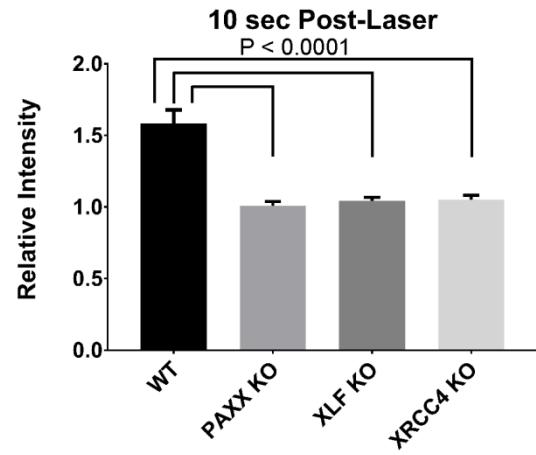

c

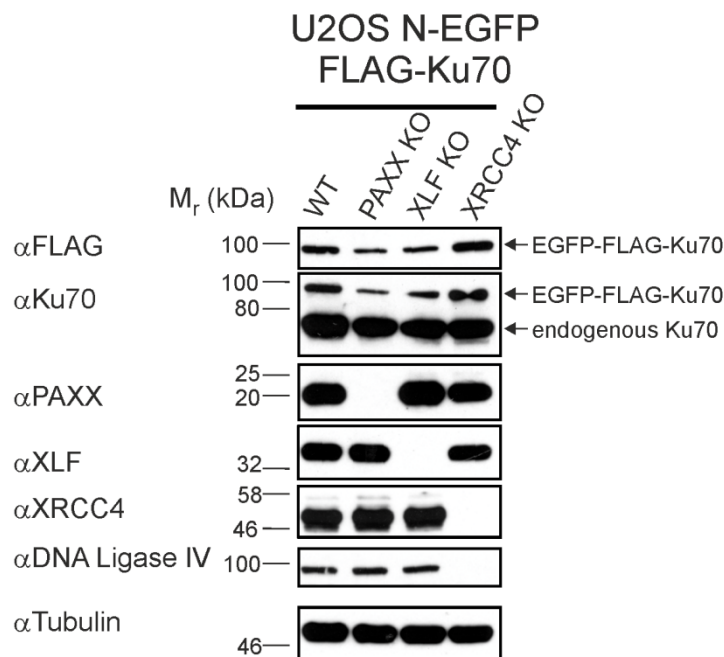

**Supplementary Figure 4: Role of PAXX and its paralogs in the recruitment of Pol  $\lambda$  to laser microirradiation-induced DNA damage sites.** (a): Immunoblot showing N-EGFP- and -mCherry-Pol  $\lambda$  fusion proteins are expressed as 100kDa proteins in U2OS cells. (b): Bar graph indicates the

mean  $\pm$  SEM for normalised N-EGFP- Pol  $\lambda$  fluorescence at the laser-induced microirradiation site 10 sec following laser pulse. P-values were calculated using a 2-tailed students t-test with Graphpad. (c): Immunoblot analysis of N-EGFP-FLAG-Ku70-expressing U2OS cells deficient in PAXX, XLF or XRCC4 generated by CRISPR-Cas9. WCL were resolved by SDS-PAGE and the indicated proteins detected by immunoblotting.

**Supplementary Figure 5**

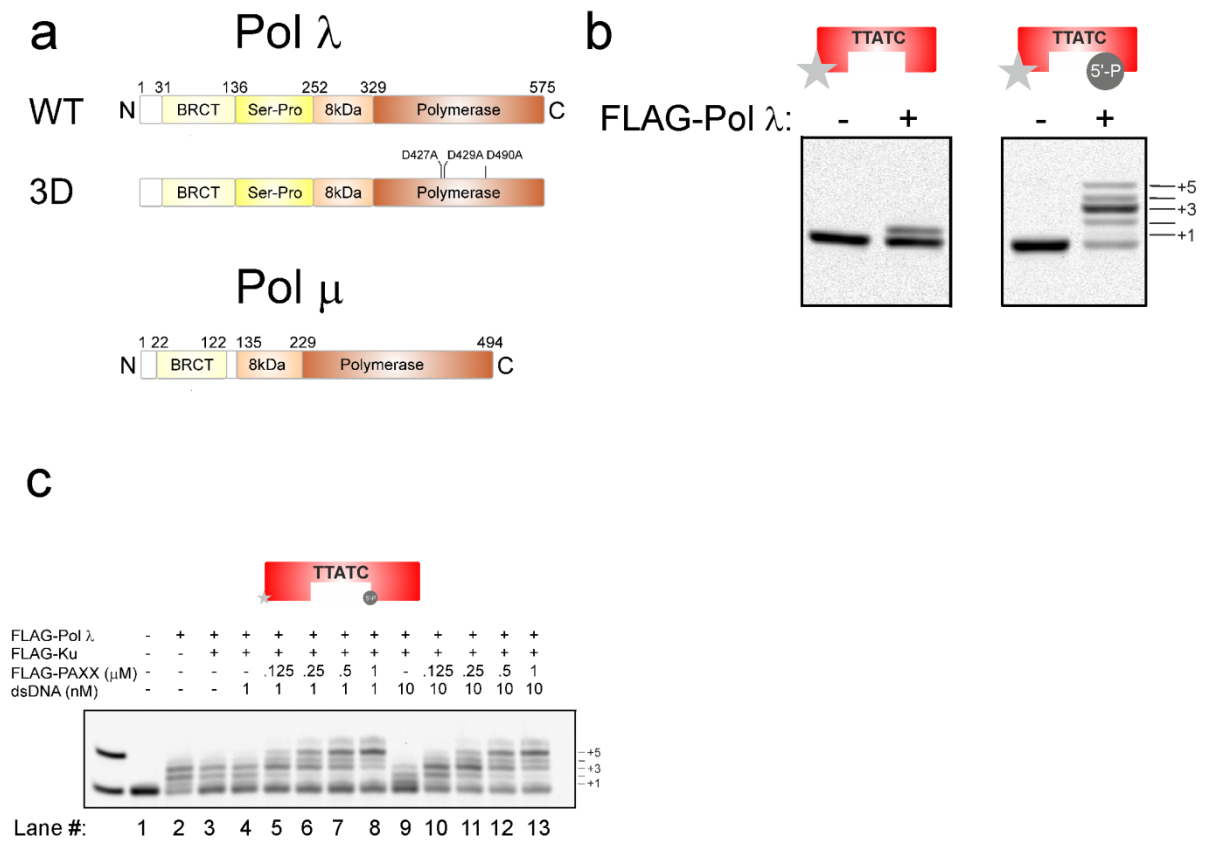

**Supplementary Figure 5: PAXX stimulates Pol  $\lambda$ -dependent gap filling synthesis activity in the presence of Ku** (a): Schematic representation of catalytically-inactive Pol  $\lambda$  D427A/D429A/D490A mutant and Pol  $\mu$ . (b): Gap-filling synthesis activity of FLAG-Pol  $\lambda$ -WT using either an IRDye® 700-labelled non-phosphorylated (*left panel*) or 5'-phosphorylated (*right panel*) 5nt-gapped dsDNA (33-mer) substrate. (c): PAXX enhances Pol  $\lambda$ -dependent gap filling synthesis activity in a concentration-dependent manner in the presence of Ku.

**Supplementary Figure 6**

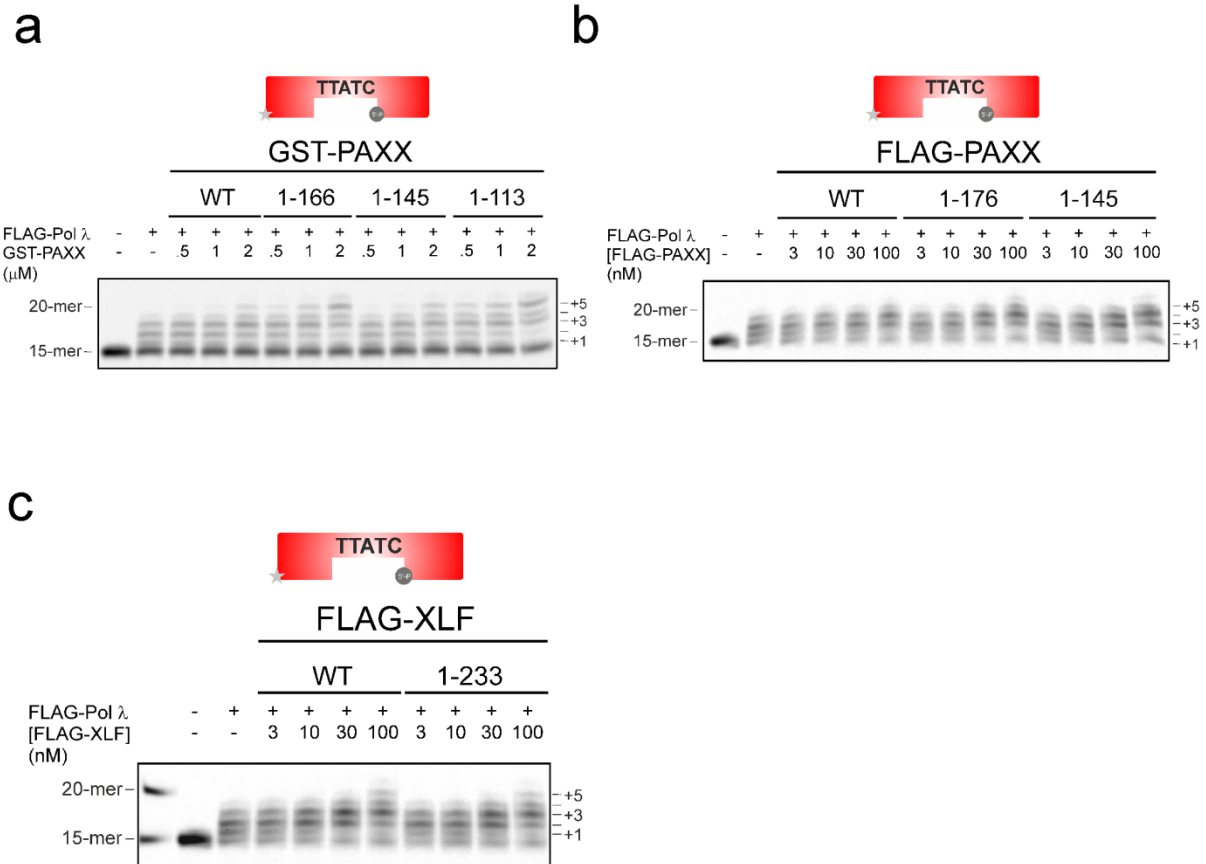

**Supplementary Figure 6: C-terminal regions of PAXX and XLF are not required for stimulation of Pol  $\lambda$ -dependent gap filling synthesis activity.** (a): Effect of GST-PAXX C-terminal deletion mutants on Pol  $\lambda$ -dependent gap filling synthesis activity. (b): Stimulation of Pol  $\lambda$ -dependent gap filling synthesis activity by PAXX is not affected by deletion of its C-terminal 59 amino acids. (c): Stimulation of Pol  $\lambda$ -dependent gap filling synthesis activity by XLF is not affected by deletion of its C-terminal 66 amino acids.

Supplementary Figure 7

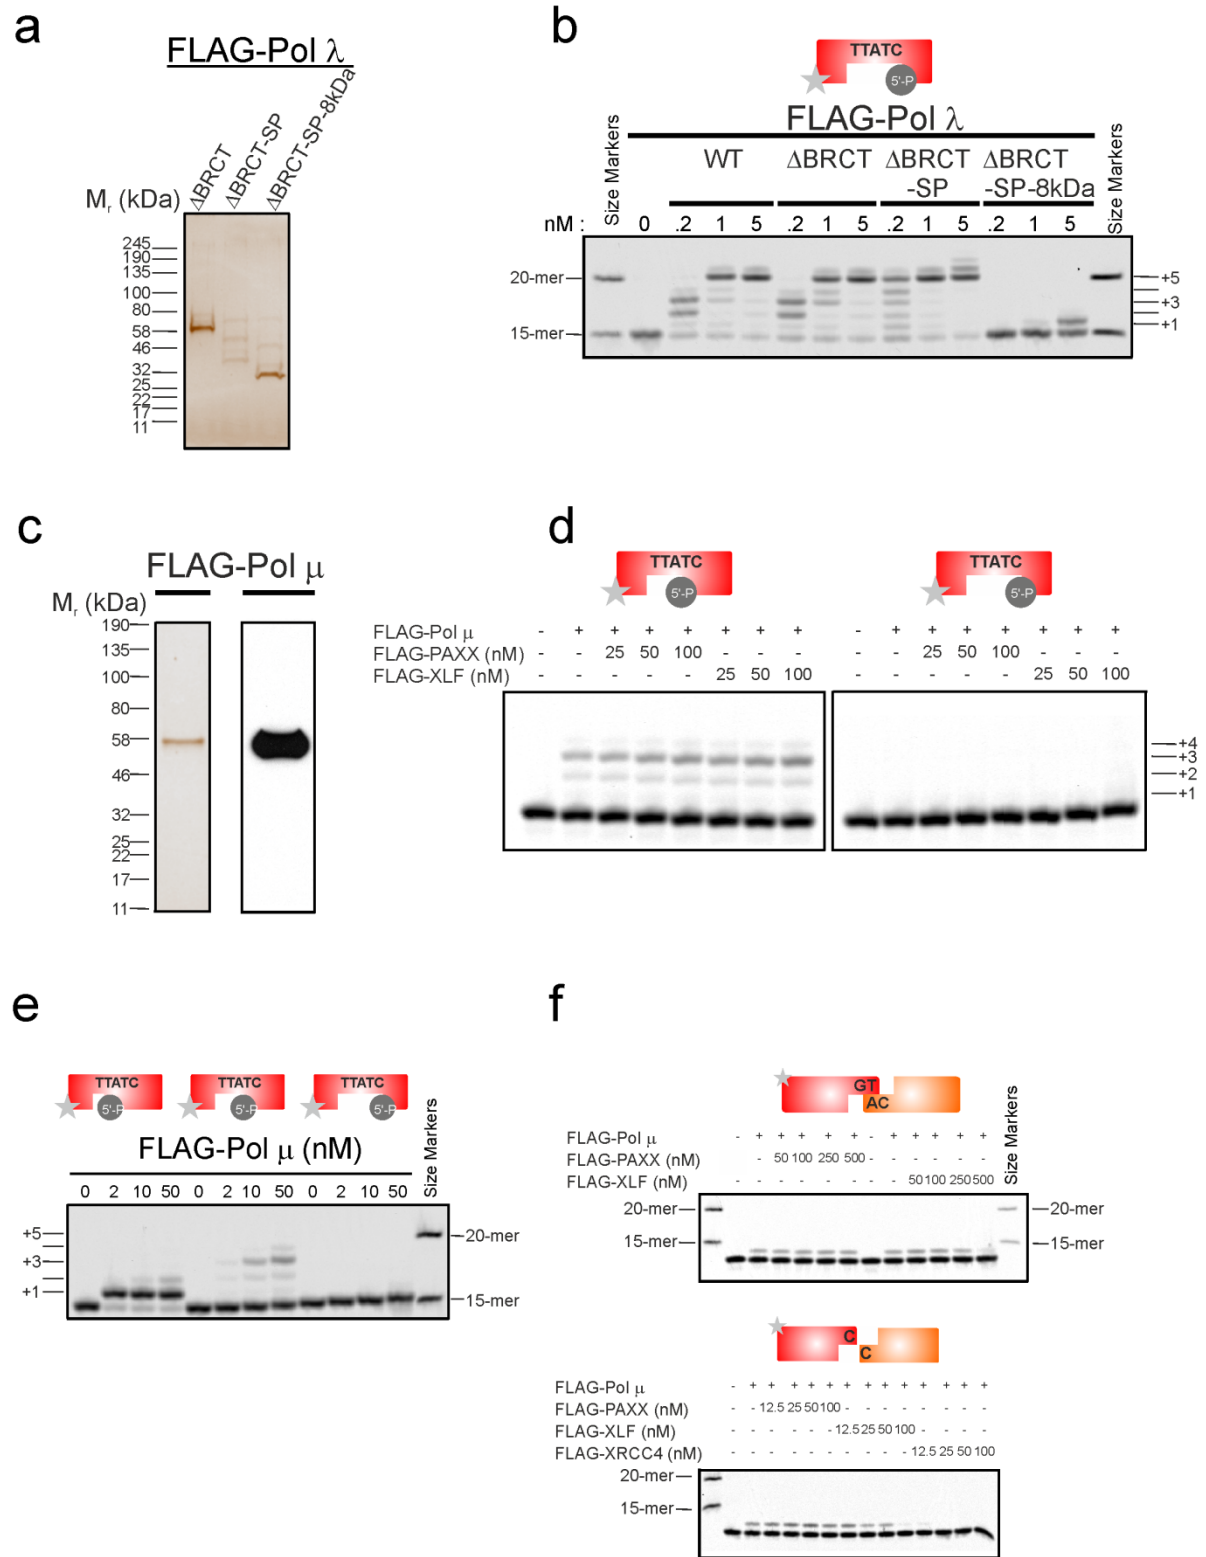

Supplementary Figure 7: XRCC4 family proteins do not stimulate template-dependent or – independent activity of Pol  $\mu$ . (a): Silver-stained gel showing purified FLAG-tagged human Pol  $\lambda$ -



$\Delta$ BRCT,  $-\Delta$ BRCT-Ser/Pro and  $\Delta$ BRCT-Ser/Pro-8kDa domain mutants. (b): Gap-filling synthesis reactions were performed using an IRDye® 700-labelled 5'-phosphorylated 5nt-gapped dsDNA (33-mer) substrate with the indicated concentrations of FLAG-Pol  $\lambda$ -WT,  $-\Delta$ BRCT,  $-\Delta$ BRCT-Ser/Pro or  $\Delta$ BRCT-Ser/Pro-8kDa domain mutants. (c): Silver-stained gel and FLAG immunoblot for purified human Pol  $\mu$ . (d): Gap-filling synthesis reactions were performed with FLAG-tagged human Pol  $\mu$  and IRDye® 700-labelled 3- or 5nt-gapped dsDNA (33-mer) substrates (*left* and *right* panels, respectively) with the indicated concentrations of FLAG-PAXX or  $-\Delta$ XLF (e): Gap-filling synthesis reactions were performed with IRDye® 700-labelled 1-, 3- or 5nt-gapped dsDNA (33-mer) substrates and FLAG-tagged human Pol  $\mu$  (0-50 nM). IRDye®-800-labelled 15- and 20 nt oligonucleotides size markers are shown in the far-right lane. (f): Assays were performed using the indicated IRDye® 700-labelled NHEJ substrates containing either 1bp complementary template (*upper* panel) or no complementary template sequence (*lower* panel) with FLAG-Pol  $\mu$  and the indicated concentrations of FLAG-PAXX,  $-\Delta$ XLF or  $-\Delta$ XRCC4.

Supplementary Figure 8

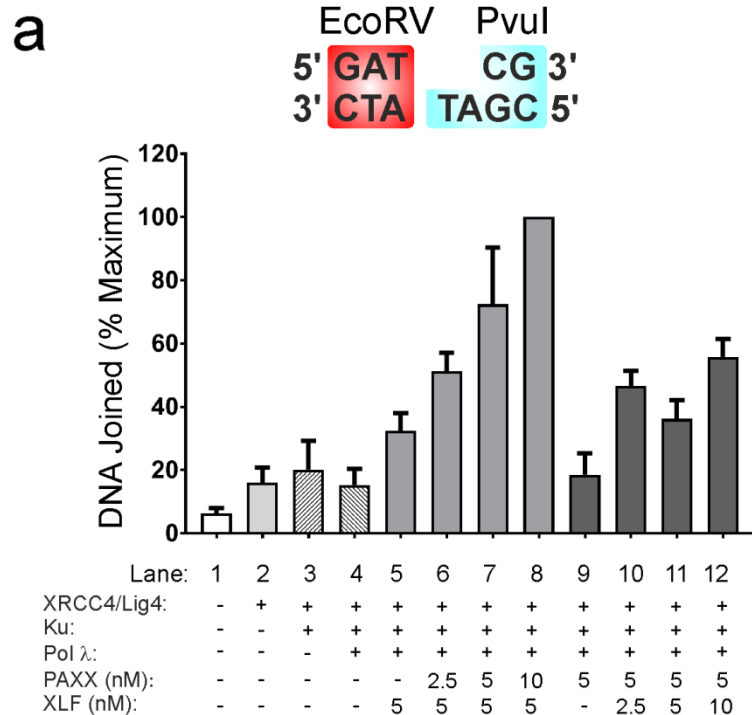

**Supplementary Fig. 8:** (a) PAXX and XLF synergise with Pol λ in a concentration-dependent manner to promote ligation of non-cohesive DNA ends which require Pol λ gap filling activity. Linear EcoRV-PvuI blunt-2nt 3' overhang DNA substrate was incubated with the indicated combinations of XRCC4/Lig IV, Ku70/80, PAXX, XLF and Pol λ and the joining efficiency quantified by qPCR with a TaqMan probe using a standard curve of  $\log_{10}$  % joining efficiency versus  $C_t$  value generated using prejoined DNA fragments. Results shown are the mean  $\pm$  SEM from 3 experiments performed in triplicate. Samples in lanes 7 and 11 contain the same reaction components, except for the order of addition of PAXX and XLF.



Supplementary Figure 9

Fig. 3b

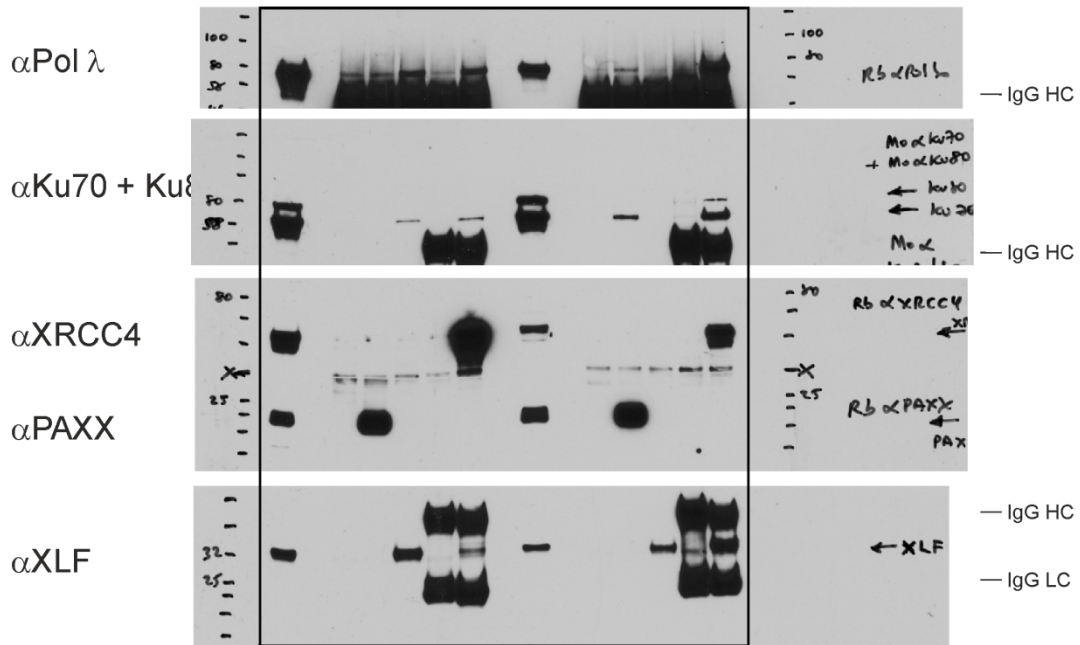

Supplementary Figure 9

Fig. 3c

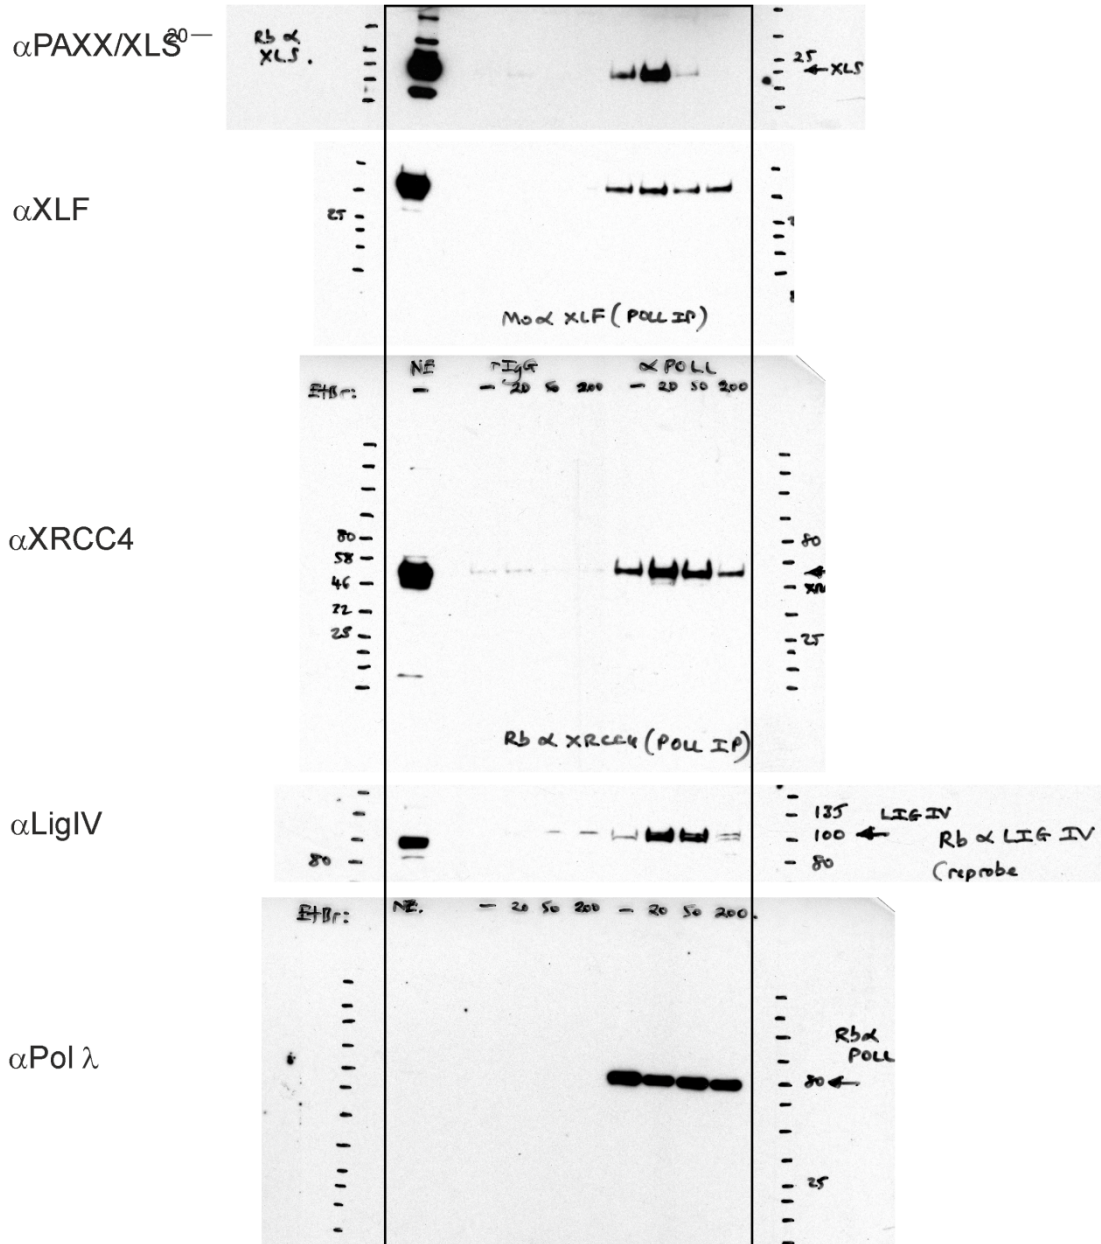

Supplementary Figure 9

Fig. 3e

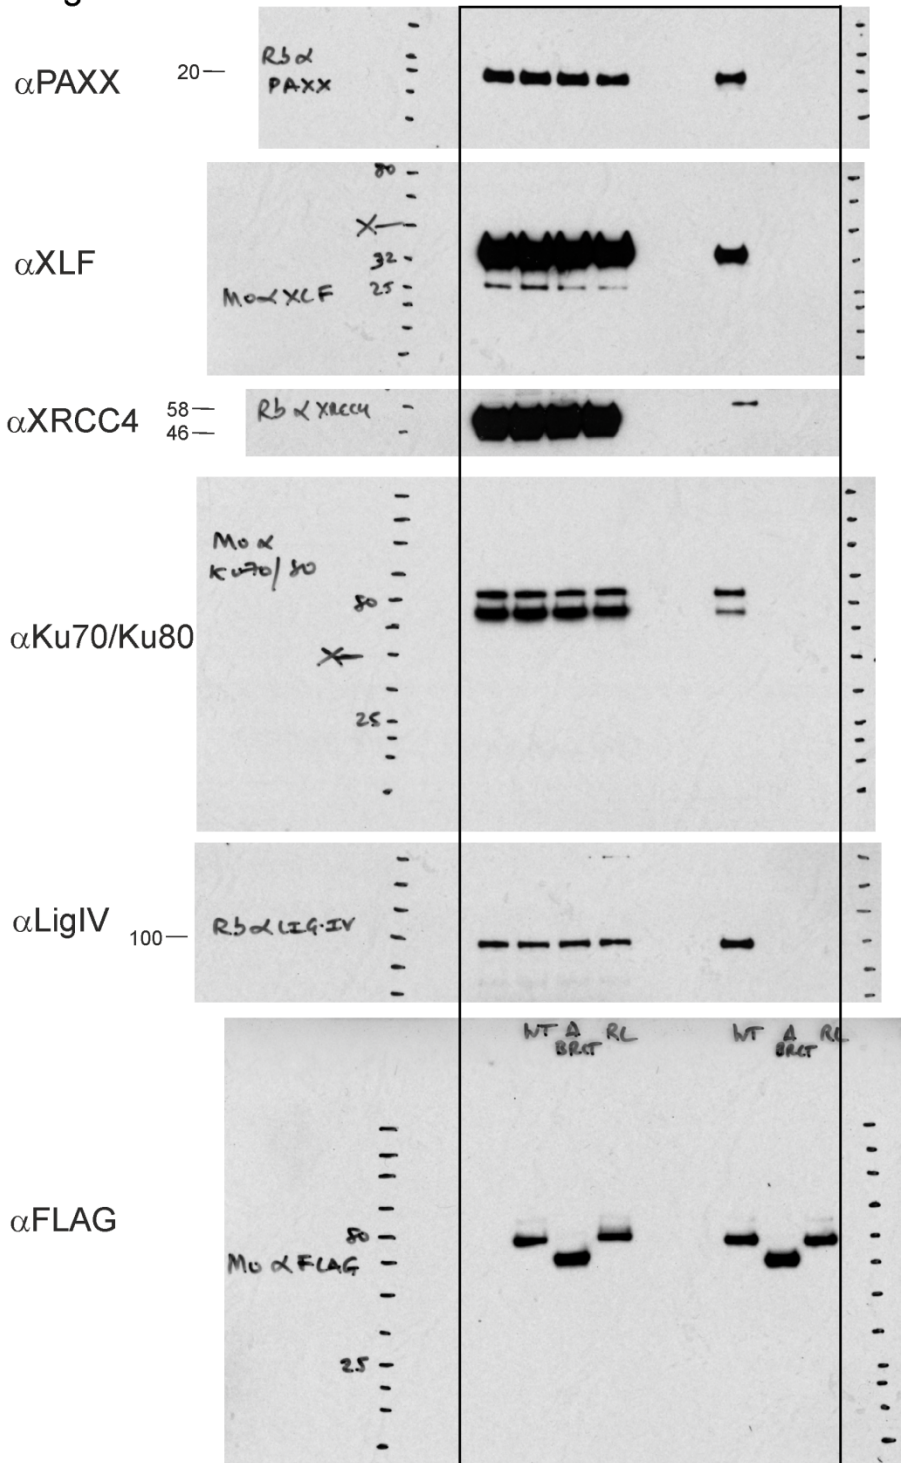



Supplementary Figure 9

Fig. 5d

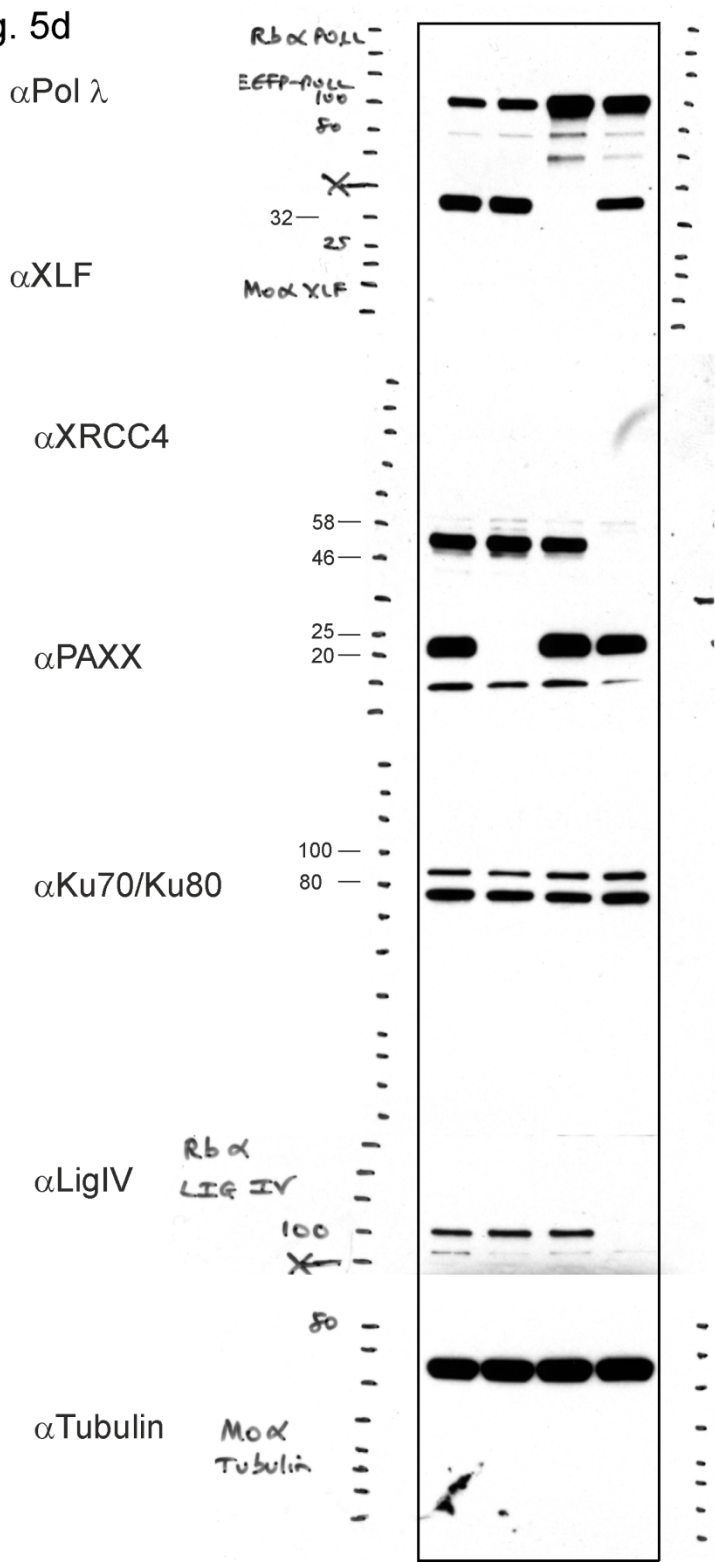

# Supplementary Figure 9

## Fig. 7c-left panel

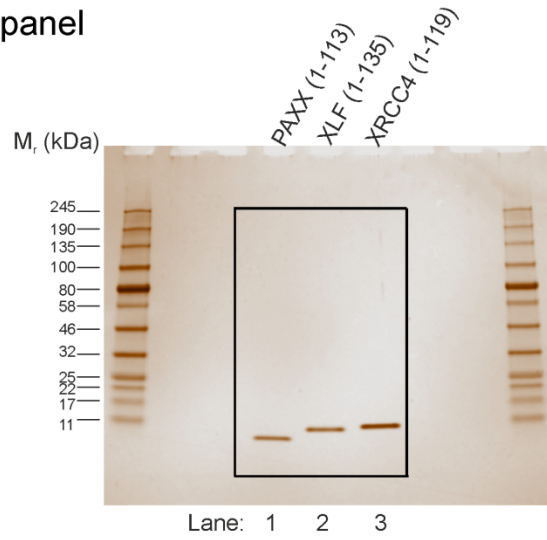

## Fig. 7c-right panel

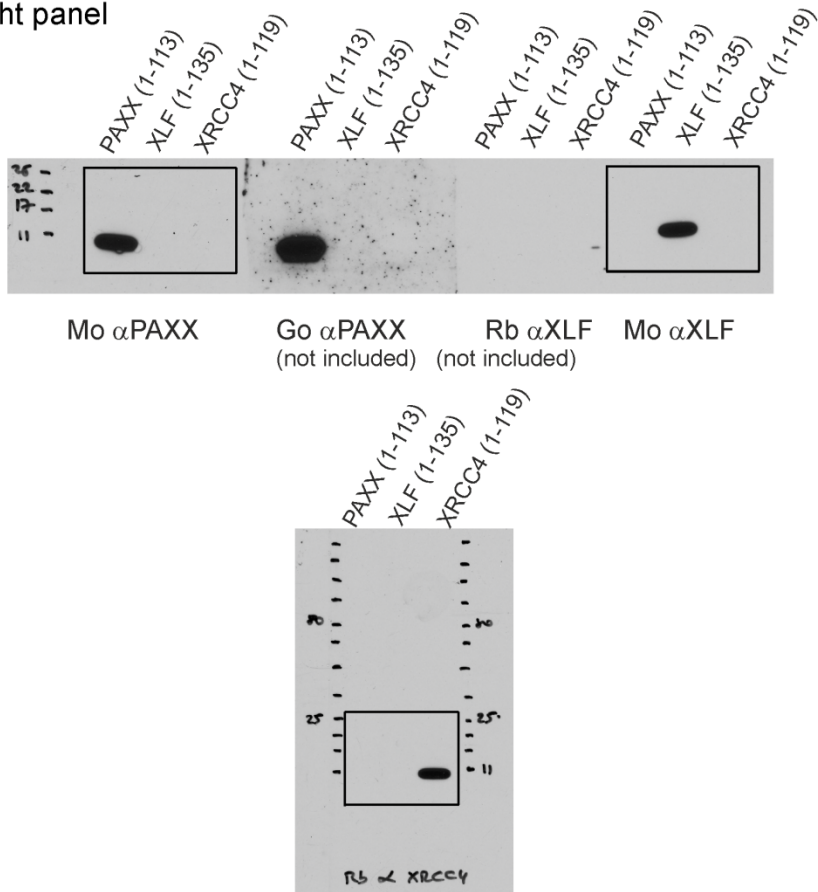



Supplementary Figure 9

Fig. 10a

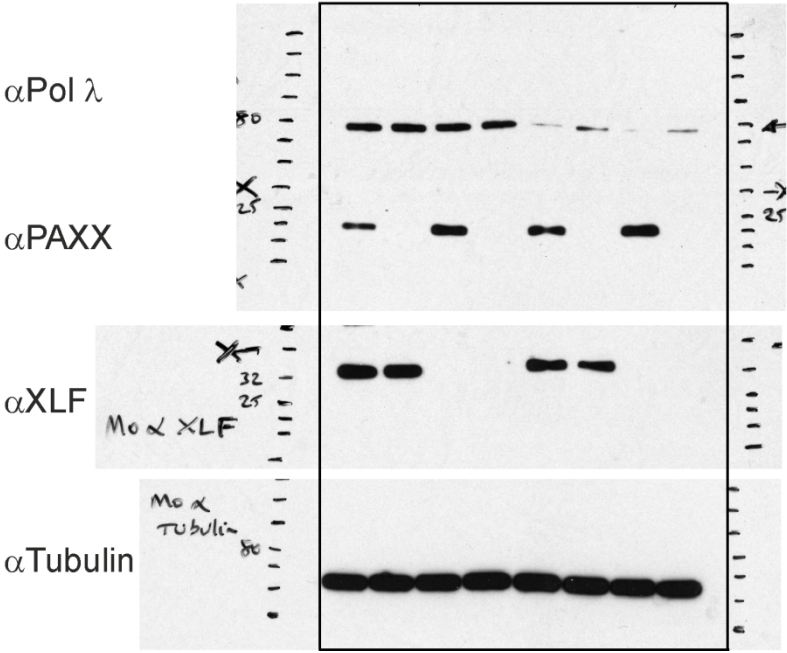

**Supplementary Table 1:**

| <b>DNA Substrate</b>                         | <b>Primer</b> | <b>Sequence</b>                         |
|----------------------------------------------|---------------|-----------------------------------------|
| <b>5nt gap 33-mer</b><br>(5'-phosphorylated) | 33-mer        | 5'-ACTGGCCGTCGTTCTATTGTACTCACTGTGATC-3' |
|                                              | 15-mer        | 5'-IRDye® 700 -GATCACAGTGAGTAC-3'       |
|                                              | 13-mer        | 5'-pAACGACGGCCAGT-3'                    |
| <b>3nt gap 33-mer</b><br>(5'-phosphorylated) | 33-mer        | As above                                |
|                                              | 15-mer        | As above                                |
|                                              | 15-mer        | 5'-pAGAACGACGGCCAGT-3'                  |
| <b>1nt gap 33-mer</b><br>(5'-phosphorylated) | 33-mer        | As above                                |
|                                              | 15-mer        | As above                                |
|                                              | 17-mer        | 5'-pATAGAACGACGGCCAGT-3'                |
| <b>NHEJ</b><br>(template-dependent)          | 13-mer        | 5'-IRDye® 700 -CCCTCCCTCCCGT-3'         |
|                                              | 11-mer        | 5'-GGGAGGGAGGG-3'                       |
|                                              | 15-mer        | 5'-GCACTCACGTCCCCA-3'                   |
|                                              | 13-mer        | 5'-GGGACGTGAGTGC-3'                     |
| <b>NHEJ</b><br>(template-independent)        | 12-mer        | 5'-IRDye® 700 -CCCTCCCTCCCC-3'          |
|                                              | 11-mer        | 5'-GGGAGGGAGGG-3'                       |
|                                              | 14-mer        | 5'-GCACTCACGTCCCC-3'                    |
|                                              | 13-mer        | 5'-GGGACGTGAGTGC-3'                     |

**Supplementary Table 2:**

| <b>Primer</b>      | <b>FWD/REV</b> | <b>Sequence</b>               |
|--------------------|----------------|-------------------------------|
| <b>EcoRI-DNA1</b>  | <b>FWD</b>     | CGGAATTCACAATTAATAGACTGGATGG  |
| <b>EcoRI-DNA1</b>  | <b>REV</b>     | CGGAATTCATCTCAGTTCGGTGTAGGTC  |
| <b>KpnI-DNA1</b>   | <b>FWD</b>     | CGGGTACCACAATTAATAGACTGGATGG  |
| <b>KpnI-DNA1</b>   | <b>REV</b>     | CGGGTACCATCTCAGTTCGGTGTAGGTC  |
| <b>EcoRV-DNA1</b>  | <b>FWD</b>     | CGGATATCACAATTAATAGACTGGATGG  |
| <b>EcoRV-DNA1</b>  | <b>REV</b>     | CGGATATCATCTCAGTTCGGTGTAGGTC  |
| <b>BstEII-DNA1</b> | <b>FWD</b>     | CGGGTGACCACAATTAATAGACTGGATGG |
| <b>BstEII-DNA1</b> | <b>REV</b>     | CGGGTGACCATCTCAGTTCGGTGTAGGTC |
| <b>PvuII-DNA1</b>  | <b>FWD</b>     | CGCGATCGACAATTAATAGACTGGATGG  |
| <b>PvuII-DNA1</b>  | <b>REV</b>     | CGCGATCGATCTCAGTTCGGTGTAGGTC  |

**Supplementary Table 3:**

| <b>Primer</b>      | <b>FWD/REV</b> | <b>Sequence</b>               |
|--------------------|----------------|-------------------------------|
| <b>EcoRI-DNA2</b>  | <b>FWD</b>     | CGGAATTCGGAGCTTCCAGGGGGAAACG  |
| <b>EcoRI-DNA2</b>  | <b>REV</b>     | CGGAATTCGGCAGCTTCCACAGCAATGG  |
| <b>KpnI-DNA2</b>   | <b>FWD</b>     | CGGGTACCGGAGCTTCCAGGGGGAAACG  |
| <b>KpnI-DNA2</b>   | <b>REV</b>     | CGGGTACCGGCAGCTTCCACAGCAATGG  |
| <b>EcoRV-DNA2</b>  | <b>FWD</b>     | CGGATATCGGAGCTTCCAGGGGGAAACG  |
| <b>EcoRV-DNA2</b>  | <b>REV</b>     | CGGATATCGGCAGCTTCCACAGCAATGG  |
| <b>BstEII-DNA2</b> | <b>FWD</b>     | CGGGTGACCGGAGCTTCCAGGGGGAAACG |
| <b>BstEII-DNA2</b> | <b>REV</b>     | CGGGTGACCGGCAGCTTCCACAGCAATGG |
| <b>PvuII-DNA2</b>  | <b>FWD</b>     | CGCGATCGGGAGCTTCCAGGGGGAAACG  |
| <b>PvuII-DNA2</b>  | <b>REV</b>     | CGCGATCGGGCAGCTTCCACAGCAATGG  |

**Supplementary Table 4:**

| <b>Gene</b>      | <b>Exon</b> | <b>Target Sequence</b> |
|------------------|-------------|------------------------|
| <b>PAXX</b>      | 1           | GTGCAGAGCGGCGGCGACAG   |
| <b>XLF/NHEJ1</b> | 7           | TTGGCTATCGATTCCCTTGCA  |
| <b>XLF/NHEJ1</b> | 3           | TGCATCTGCCACACAATCAC   |
| <b>XRCC4</b>     | 4           | GTTCTCTAATGACTTCAGCT   |

**Supplementary Table 5:**

| Cell Line           | Clone | Indel Size (nt)                  | Indel Sequence                                                                                                                                                                                                                                       |
|---------------------|-------|----------------------------------|------------------------------------------------------------------------------------------------------------------------------------------------------------------------------------------------------------------------------------------------------|
| PAXX<br>KO          | 11    | del 37<br>del 35                 | GGATCCGCTGTCGCCGCCGCTCTGCACGCTGCCGCCG<br>CCGCTGTCGCCGCCGCTCTGCACGCTGCCGCCGGG                                                                                                                                                                         |
| XLF KO              | 2-22  | del 2<br>del 163                 | TT<br>TCCTTGCAGGGAAGCACTGTTTGAGGTATGAGGATCT<br>CCTGAAATCAGAAAGATCAAGAGAAGATAGTGATAA<br>ATGCCTTCTTCTTACCAGGAAGATATTAGCATTCCACC<br>AAGCATTCTGATAAAGGCCAGGGTTTGGTACAAATAT<br>ATAAGCAGACAGAAGT                                                           |
| XRCC4<br>KO         | 1-12  | in 1<br>del 3 (+ 4<br>nt change) | T<br>CCAGCTG to AAAT                                                                                                                                                                                                                                 |
| PAXX/<br>XLF<br>DKO | 2-1   | del 225<br><br>in 1              | CACAAATATCCCTCAATATTTTTGAGGCAGTGCCAATGAAGCAGC<br>AATTCCAGGGACCACTGGCTTGGGGGCTATAGGTGCCAACTCTCA<br>GAACACCATCCAGGAAGCTGCTCATGACTCACCGTGGACTCTTTC<br>TCAGGTGCTGAGAGGGTTGGGGCTGAGGAGACCAGTTGTTCTGG<br>CTGGTTTACACATTGGCTATCGATTCTTGCAGGGAAGCACTGTT<br>T |

**Supplementary Table 6: NHEJ-related Proteins identified in purified FLAG IPs for FLAG-PAXX, -XRCC4, -XLF and -DNA-PKcs in the Benzonase-treated Nuclear Fraction identified by Mass Spectrometry**

| Identified Protein (fmol)       | <u>Bait Protein</u> |        |       |        |          |
|---------------------------------|---------------------|--------|-------|--------|----------|
|                                 | Control             | PAXX   | XRCC4 | XLF    | DNA-PKcs |
| <b>DNA-PKcs</b>                 | 46.8                | 1591.2 | 203.3 | 1454.2 | 1745     |
| <b>Ku70</b>                     | 31.7                | 1067.2 | 106   | 813.8  | 984      |
| <b>Ku80</b>                     | 39.7                | 825.7  | 150.8 | 792.5  | 1026.9   |
| <b>Lig IV</b>                   | 0                   | 56.3   | 67    | 203.9  | 10       |
| <b>XRCC4</b>                    | 4.8                 | 73.1   | 412   | 203.4  | 55       |
| <b>XLF</b>                      | 0                   | 74.6   | 64.9  | 777.3  | 122.2    |
| <b>PAXX</b>                     | 112                 | 1026.3 | 118.5 | 162.9  | 156.6    |
| <b>PARP1</b>                    | 34.4                | 81.5   | 8     | 51     | 63.9     |
| <b>PNKP</b>                     | 0                   | 0      | 3.5   | 15.7   | 0        |
| <b>WRN</b>                      | 0                   | 81.6   | 0     | 47.7   | 129      |
| <b>Pol <math>\lambda</math></b> | 0                   | 53.2   | 4.1   | 38.9   | 0        |
| <b>Artemis</b>                  | 0                   | 0      | 0     | 0      | 0        |
| <b>APTX</b>                     | 0                   | 0      | 7.5   | 0      | 0        |
| <b>APLF</b>                     | 0                   | 0      | 0     | 6.8    | 0        |

Results shown are the averages (fmol) from duplicate technical repeats of two separate experiments. FLAG-tagged bait NHEJ factors and Pol  $\lambda$  are highlighted by shaded yellow and pale yellow boxes respectively. Abbreviations used are as follows: DNA-PKcs, DNA-dependent protein kinase catalytic subunit; Lig IV, DNA ligase IV; XLF, XRCC4-like factor; PAXX, paralog of XRCC4 and XLF; PARP1, poly(ADP-ribose) polymerase 1; PNKP, bifunctional polynucleotide phosphatase/kinase; WRN, Werner helicase; Pol  $\lambda$ , DNA polymerase lambda; APTX, Aprataxin; APLF, Aprataxin- and PNK-like factor.

**Supplementary Table 7: NHEJ-related Proteins identified in purified FLAG IPs for FLAG-PAXX, -XRCC4, -XLF and -DNA-PKcs in the Nucleoplasmic Fraction identified by Mass Spectrometry**

| Identified Protein (fmol) | <u>Bait Protein</u> |      |       |        |          |
|---------------------------|---------------------|------|-------|--------|----------|
|                           | Control             | PAXX | XRCC4 | XLF    | DNA-PKcs |
| DNA-PKcs                  | 0                   | 0    | 20.1  | 254.3  | 1451     |
| Ku70                      | 2.8                 | 10.1 | 22    | 180.6  | 396      |
| Ku80                      | 0                   | 10.9 | 19    | 147.9  | 277.6    |
| Lig IV                    | 0                   | 0    | 139.1 | 188.9  | 158.9    |
| XRCC4                     | 17.3                | 37.2 | 1396  | 554.2  | 89.9     |
| XLF                       | 0                   | 9.1  | 133.6 | 1354.6 | 94.8     |
| PAXX                      | 143.7               | 1379 | 79.3  | 110.2  | 130.2    |
| PARP1                     | 0                   | 0    | 12.2  | 101    | 145.9    |
| PNKP                      | 0                   | 0    | 65.8  | 39.8   | 11.4     |
| WRN                       | 0                   | 0    | 0     | 0      | 63.3     |
| Pol $\lambda$             | 0                   | 0    | 0     | 5.3    | 0        |
| Artemis                   | 0                   | 0    | 0     | 0      | 20.3     |
| APTX                      | 0                   | 0    | 41.7  | 0      | 0        |
| APLF                      | 0                   | 0    | 0     | 0      | 0        |

Results shown are the averages (fmol) from duplicate technical repeats of two separate experiments. FLAG-tagged bait NHEJ factors and Pol  $\lambda$  are highlighted by shaded yellow and pale yellow boxes respectively.



**Supplementary Table 8: Proteins identified by Mass Spectrometry which selectively interact with PAXX or XLF<sup>1,2</sup>**

| PAXX        |                   | XLF         |                   |
|-------------|-------------------|-------------|-------------------|
| Nucleoplasm | Soluble Chromatin | Nucleoplasm | Soluble Chromatin |
|             | KV201_HUMAN       | SP16H_HUMAN | KV206_HUMAN       |
|             | DYHC2_HUMAN       | SSRP1_HUMAN | H2A2B_HUMAN       |
|             | MYOME_HUMAN       | LAP2A_HUMAN | APOB_HUMAN        |
|             | PARK7_HUMAN       | PNKP_HUMAN  | PNKP_HUMAN        |
|             | PP6R3_HUMAN       | KPYM_HUMAN  |                   |
|             | SMEK3_HUMAN       | OGFD1_HUMAN |                   |
|             | NEBU_HUMAN        | RFA1_HUMAN  |                   |
|             | CREB1_HUMAN       | SEP14_HUMAN |                   |
|             | RYR3_HUMAN        | IFFO1_HUMAN |                   |
|             | CK5P2_HUMAN       | PDIA1_HUMAN |                   |
|             |                   | EMD_HUMAN   |                   |
|             |                   | IFFO2_HUMAN |                   |
|             |                   | BAF_HUMAN   |                   |
|             |                   | TCPB_HUMAN  |                   |
|             |                   | P4HA1_HUMAN |                   |
|             |                   |             |                   |
|             |                   |             |                   |
|             |                   |             |                   |

<sup>1</sup>Proteins listed include only those detected above an average of > 10 fmol in 2 experiments (duplicate technical repeats per expt).

<sup>2</sup>All keratin, tubulin and ribosomal species of proteins were excluded from the list.

**Supplementary Table 9: NHEJ-related Proteins identified in purified FLAG-Pol  $\lambda$  IPs of Nucleoplasmic and Benzonase-treated Fractions identified by Mass Spectrometry**

| Identified Protein (fmol) | Nucleoplasm |               | Benzonase-treated Soluble Chromatin |               |
|---------------------------|-------------|---------------|-------------------------------------|---------------|
|                           | Control     | Pol $\lambda$ | Control                             | Pol $\lambda$ |
| Pol $\lambda$             | 81.2        | 1400          | 96.7                                | 557           |
| DNA-PKcs                  | 7.9         | 381.3         | 0                                   | 35.0          |
| Ku70                      | 19.2        | 371.0         | 0                                   | 206.1         |
| Ku80                      | 32.8        | 452.6         | 14                                  | 217.7         |
| XRCC4                     | 0           | 25.8          | 0                                   | 17.5          |
| XLF                       | 0           | 25.1          | 0                                   | 0             |
| PAXX                      | 0           | 47.9          | 0                                   | 0             |
| Lig IV                    | 0           | 21.5          | 0                                   | 36.3          |
| PARP1                     | 9.8         | 90.9          | 14.1                                | 113.4         |
| PNKP                      | 0           | 0             | 0                                   | 119.0         |
| WRN                       | 0           | 13.6          | 0                                   | 0             |
| Artemis                   | 0           | 0             | 0                                   | 0             |
| APTX                      | 0           | 0             | 0                                   | 0             |
| APLF                      | 0           | 0             | 0                                   | 0             |

Results shown are the averages (fmol) from either duplicate or triplicate technical repeats of two separate experiments. FLAG-tagged Pol  $\lambda$  bait protein and XRCC4 paralogs are highlighted by shaded yellow and pale yellow boxes respectively. Abbreviations used are as follows: DNA-PKcs, DNA-dependent protein kinase catalytic subunit; Lig IV, DNA ligase IV; XLF, XRCC4-like factor; PAXX, paralog of XRCC4 and XLF; PARP1, poly(ADP-ribose) polymerase 1; PNKP, bifunctional polynucleotide phosphatase/kinase; WRN, Werner helicase; Pol  $\lambda$ , DNA polymerase lambda; APTX, Aprataxin; APLF, Aprataxin- and PNK-like factor.
