# Supplementary material for: PAXX and its paralogs synergistically direct DNA polymerase λ activity in DNA repair
Source: PubMed Central journal article supplement (PMC6155126; doi:10.1038/s41467-018-06127-y), 2018-09-24
Supplement: 41467_2018_6127_MOESM3_ESM.pdf [file 41467_2018_6127_MOESM3_ESM.pdf]

## **Description of Additional Supplementary Files**

File Name: Supplementary Data 1

Description: Table of mass-spec proteomics data for PAXX, XLF, XRCC4 and DNA-PKcs proteins.

File Name: Supplementary Data 2

Description: Table of mass-spec proteomics data for polymerase lambda protein
